# Supplementary material for: Mimic nature, beyond nature: facile synthesis of durable superhydrophobic textiles using organosilanes
Source: Royal Society of Chemistry journal article supplement (doi:10.1039/c3tb20934b), 2013-01-01
Supplement: c3tb20934b.pdf [file c3tb20934b.pdf]

Supporting Information

## Mimic Nature, Beyond Nature: Facile Synthesis of Durable Superhydrophobic Textiles Using Organosilanes

Lei Wu, Junping Zhang\*, Bucheng Li, and Aiqin Wang

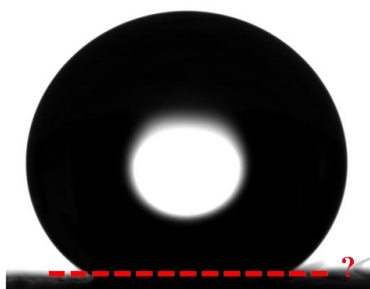

**Figure S1.** Typical image of a water drop on the superhydrophobic textile.

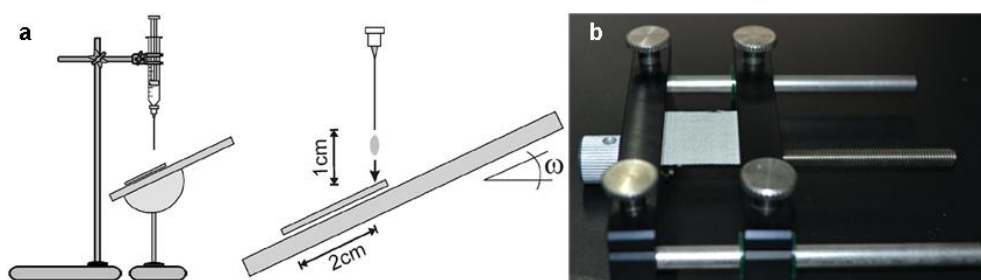

**Figure S2.** (a) Principle setup employed for measuring WSA ( $\omega$ ) and (b) the sample holder.

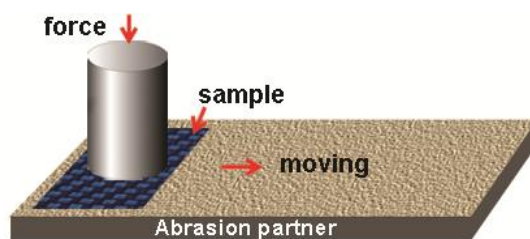

**Figure S3.** Schematic illustration of the abrasion test employed to evaluate the mechanical durability of the samples.

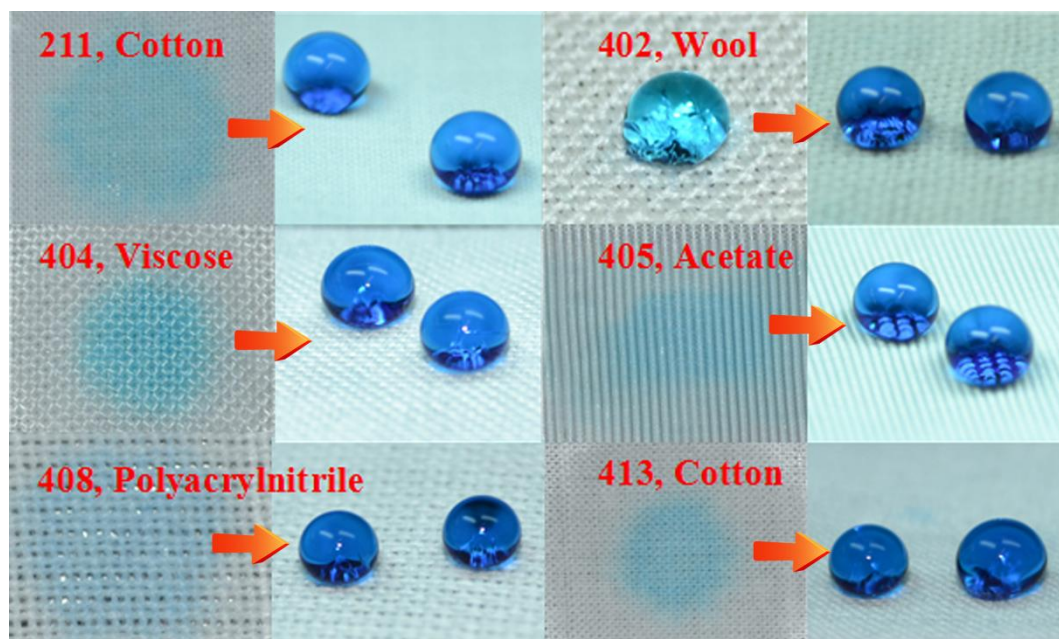

**Figure S4.** Water drops colored with MB on various textiles before and after coated with the HD-polymer/HD-silica nanocomposite.

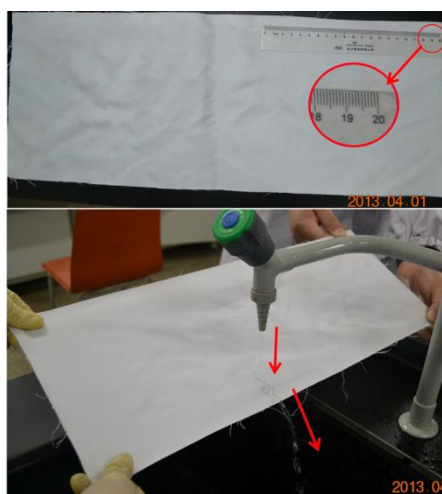

**Figure S5.** A piece of the coated polyester II textile produced on a 20 × 50cm scale and its superhydrophobicity.

**Movie S1.** Water drops bounce off the superhydrophobic polyester I textile after 200 cycles of abrasion using A4 paper and sandpaper as the abrasion partners. This video highlights the excellent superhydrophobicity after abrasion even the substrate is seriously damaged.

**Movie S2.** Water drops bounce off the superhydrophobic polyester I textile after 10 cycles of machine wash. This video highlights the excellent superhydrophobicity after laundering.

**Movie S3.** Water drops bounce off the superhydrophobic polyester I textiles after scratching with a scalpel, adhesion of double side tape, finger press and twisting by hands. This video highlights the excellent superhydrophobicity after these qualitative tests of the mechanical stability.

**Movie S4.** Oil/water separation. This video highlights potential application of the stable superhydrophobic polyester I textile for oil/water separation. Oil is colored with OR and water is colored with MB.
